# Supplementary material for: MicroRNA-27b up-regulated by human papillomavirus 16 E7 promotes proliferation and suppresses apoptosis by targeting polo-like kinase2 in cervical cancer
Source: PubMed Central journal article supplement (PMC4991410; doi:10.18632/oncotarget.7531), 2016-02-20
Supplement: oncotarget-07-19666-s001.pdf [file oncotarget-07-19666-s001.pdf]

## SUPPLEMENTARY FIGURE AND TABLE

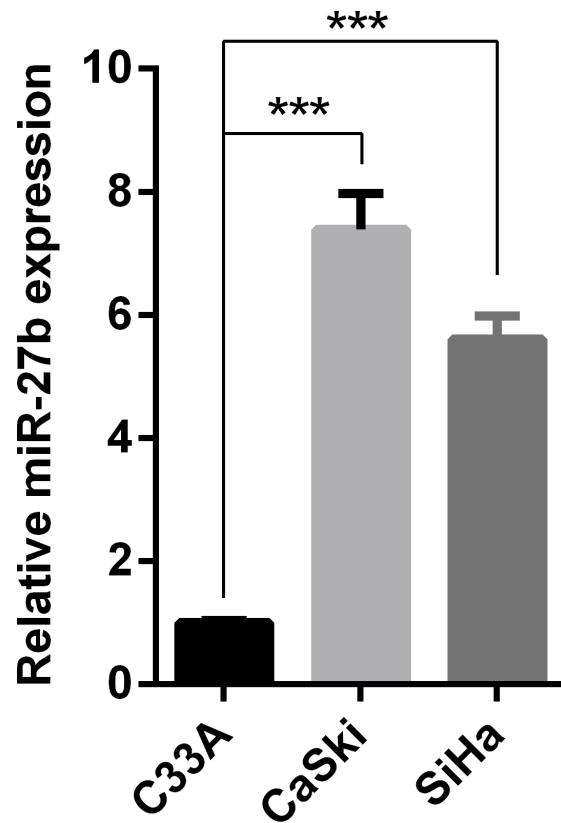

**Supplementary Figure S1: The basal level of miR-27b in C33A, CaSki and SiHa cells.** The basal level of miR-27b in C33A, CaSki and SiHa cells was measured by QPCR. The data are representative of three independent experiments. \*\*\* $P < 0.001$ .

**Supplementary Table S1: Fold changes of differentially expressed miRNAs in microarray**

| Name            | Mean of Normalized Intensities (Control) | Mean of Normalized Intensities (Silenced) | Fold Change (Silenced/Control) |
|-----------------|------------------------------------------|-------------------------------------------|--------------------------------|
| hsa-miR-31-5p   | 3.910                                    | 1.535                                     | 0.393                          |
| hsa-miR-24-3p   | 22.151                                   | 8.242                                     | 0.372                          |
| hsa-miR-103a-3p | 5.653                                    | 2.108                                     | 0.373                          |
| hsa-miR-27b-3p  | 6.288                                    | 1.888                                     | 0.300                          |
| hsa-let-7b-5p   | 3.936                                    | 1.375                                     | 0.349                          |
| hsa-miR-204-3p  | 0.876                                    | 2.463                                     | 2.812                          |
| hsa-miR-519e-5p | 0.092                                    | 1.040                                     | 11.254                         |
| hsa-miR-99b-3p  | 0.080                                    | 0.298                                     | 3.707                          |
| hsa-miR-30e-5p  | 1.721                                    | 0.613                                     | 0.356                          |
| hsa-miR-10a-5p  | 0.667                                    | 0.264                                     | 0.395                          |
| hsa-miR-424-5p  | 4.781                                    | 2.361                                     | 0.494                          |
| hsa-let-7g-5p   | 3.644                                    | 1.285                                     | 0.353                          |
| hsa-miR-183-5p  | 1.722                                    | 0.815                                     | 0.473                          |
| hsa-miR-767-5p  | 14.541                                   | 6.158                                     | 0.423                          |
| hsa-miR-151a-3p | 0.817                                    | 0.198                                     | 0.243                          |
| hsa-miR-148b-3p | 1.032                                    | 0.413                                     | 0.400                          |
| hsa-miR-33a-5p  | 4.637                                    | 1.551                                     | 0.334                          |
| hsa-miR-30c-5p  | 3.536                                    | 1.672                                     | 0.473                          |
| hsa-miR-182-5p  | 2.256                                    | 0.897                                     | 0.398                          |
| hsa-miR-194-5p  | 2.440                                    | 0.749                                     | 0.307                          |
| hsa-miR-31-3p   | 1.216                                    | 0.412                                     | 0.339                          |
| hsa-miR-660-3p  | 2.245                                    | 10.965                                    | 4.885                          |
| hsa-miR-335-5p  | 2.026                                    | 0.734                                     | 0.362                          |
| hsa-miR-342-3p  | 2.244                                    | 0.789                                     | 0.352                          |
| hsa-miR-193a-3p | 8.809                                    | 3.940                                     | 0.447                          |
| hsa-miR-25-3p   | 1.667                                    | 0.568                                     | 0.341                          |
| hsa-miR-106b-3p | 0.670                                    | 0.332                                     | 0.496                          |
| hsa-miR-19b-3p  | 6.006                                    | 2.516                                     | 0.419                          |
| hsa-miR-24-2-5p | 0.513                                    | 0.195                                     | 0.379                          |
| hsa-miR-32-5p   | 2.528                                    | 1.032                                     | 0.408                          |
| hsa-miR-200c-3p | 11.403                                   | 4.390                                     | 0.385                          |
| hsa-miR-601     | 0.026                                    | 0.146                                     | 5.532                          |
| hsa-miR-106b-5p | 10.623                                   | 3.736                                     | 0.352                          |
| hsa-miR-96-5p   | 3.389                                    | 1.158                                     | 0.342                          |

*(Continued)*

| Name                          | Mean of Normalized Intensities (Control) | Mean of Normalized Intensities (Silenced) | Fold Change (Silenced/Control) |
|-------------------------------|------------------------------------------|-------------------------------------------|--------------------------------|
| hsa-miR-151a-5p /hsa-miR-151b | 1.566                                    | 0.671                                     | 0.428                          |
| hsa-miR-141-3p                | 19.711                                   | 7.830                                     | 0.397                          |
| hsa-miR-429                   | 0.889                                    | 0.331                                     | 0.373                          |
| hsa-miR-93-5p                 | 8.589                                    | 2.973                                     | 0.346                          |
| hsa-miR-665                   | 0.132                                    | 0.576                                     | 4.352                          |
| hsa-miR-301a-3p               | 4.032                                    | 1.576                                     | 0.391                          |
| hsa-miR-191-5p                | 1.016                                    | 0.358                                     | 0.353                          |
| hsa-miR-205-5p                | 75.046                                   | 34.764                                    | 0.463                          |
| hsa-miR-22-3p                 | 12.559                                   | 4.073                                     | 0.324                          |
| hsa-miR-20a-5p                | 7.843                                    | 3.659                                     | 0.467                          |
